# Supplementary material
Source: PubMed Central journal article supplement (PMC8971596)

a

## Outpatients

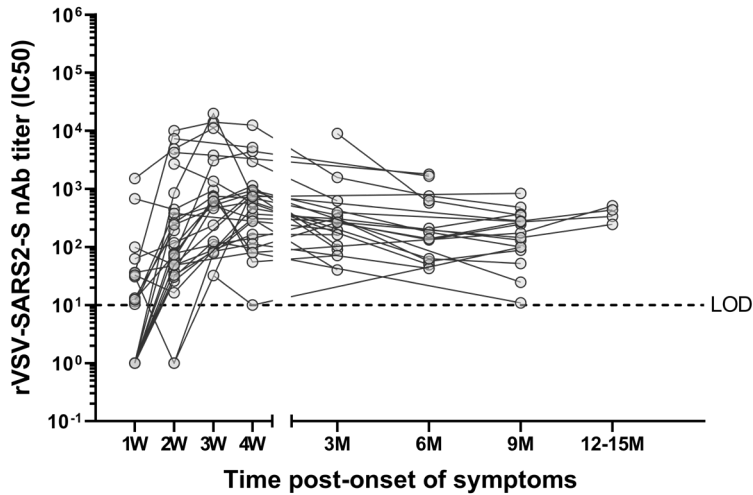

b

## Hospitalized patients

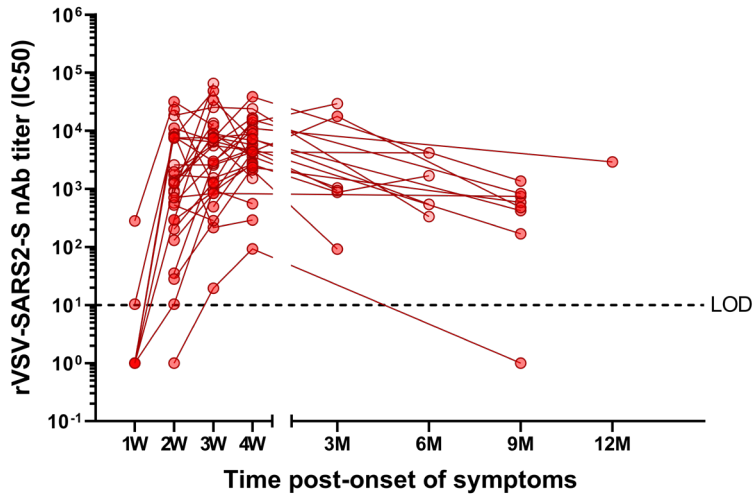

Supplement: mmc5.pdf [file mmc5.pdf]
